# Supplementary material for: TRIM5α Modulates Immunodeficiency Virus Control in Rhesus Monkeys
Source: PLoS Pathog. 2010 Jan 22;6(1):e1000738. doi: 10.1371/journal.ppat.1000738 (PMC2809762; doi:10.1371/journal.ppat.1000738)
Supplement: Table S1 — TRIM5α sequencing primers used in the study (0.05 MB PDF) [file ppat.1000738.s001.pdf]

Supplemental Table 1. TRIM5 $\alpha$  sequencing primers

| A. <i>TRIM5</i> cDNA sequencing        |                    |                                    |                            |
|----------------------------------------|--------------------|------------------------------------|----------------------------|
| Primers                                |                    | Sequences                          |                            |
| M13f                                   |                    | gtaaaacgacggccagt                  |                            |
| M13r                                   |                    | aacagctatgaccatg                   |                            |
| TRIM5 F2                               |                    | gcggaattcgccatggcttctggaatc        |                            |
| TRIM5 R2                               |                    | gcgatcgatgcctcaagagcttggtgagcacag  |                            |
| TRIM5 F3                               |                    | ggaagctgacatcagaga                 |                            |
| TRIM5 R3                               |                    | tctacctcccagtaatg                  |                            |
| TRIM5 F4                               |                    | gataagagacaagtgagc                 |                            |
| TRIM5 R4                               |                    | tccttctccagggttttgc                |                            |
| B. <i>TRIM5</i> genomic DNA sequencing |                    |                                    |                            |
| a. PCR primers                         |                    |                                    |                            |
| <i>TRIM5</i> region                    | Primer orientation | Primers                            | Sequences                  |
| Exon 2-4                               | Forward            | 9507                               | gaacaagacgaacctcagcagcc    |
|                                        | Reverse            | 11537                              | gtgctcaggcttctttccctttttac |
| Exon 5-6                               | Forward            | 23156                              | ggaaatctcacatgagtcttctggg  |
|                                        | Reverse            | 25596                              | agttaggggatataatgtgactttat |
| Exon 6-8                               | Forward            | 24761                              | gagaacattttgtttgcctccagg   |
|                                        | Reverse            | 26286                              | ttcaggtgtatgagatgcacatgg   |
| b. Sequencing primers                  |                    |                                    |                            |
| <i>TRIM5</i> region                    | Primers            | Sequences                          |                            |
| Exon 2                                 | 9536               | ggcaggagcagtggagaagctactatg        |                            |
| Exon 3                                 | 10431              | ccaagtcatggattctcattgcc            |                            |
| Exon 4                                 | 11261              | cagcctctgcctggttagactgag           |                            |
| Exon 5                                 | 23301              | atttcttaattgatgtttctcttcttcttag    |                            |
| Exon 6                                 | 24914              | gggacacaaggtcagagggtttgg           |                            |
| Exon 7                                 | 25264              | ctaccatagggcatacctactctttccc       |                            |
| Exon 8                                 | 25616              | tatatcccctaactgacctgttaattttctacag |                            |
|                                        | 25941              | caacctaaatatggctactgggttatagg      |                            |
